# Supplementary material for: Development of neural perceptual vowel spaces during the first year of life
Source: PubMed Central journal article supplement (PMC6925299; doi:10.1038/s41598-019-55085-y), 2019-12-20
Supplement: 41598_2019_55085_MOESM2_ESM.pdf [file 41598_2019_55085_MOESM2_ESM.pdf]

## **Development of neural perceptual vowel spaces during the first year of life**

Kathleen M McCarthy<sup>\*1,3</sup>, Katrin Skoruppa<sup>2</sup>, and Paul Iverson<sup>3</sup>

<sup>1</sup>Department of Linguistics, Queen Mary University of London, Mile End Road, London E1 4NS, United Kingdom

<sup>2</sup>Institut des Sciences du Langage et de la Communication, Université de Neuchâtel, Rue Pierre-à-Mazel 7, 2000 Neuchâtel, Switzerland

<sup>3</sup>Speech, Hearing and Phonetic Sciences, University College London, Chandler House, 2 Wakefield Street, London, WC1N 1PF, United Kingdom

## ANOVA tests results and effect sizes for the target vowel contrasts

| Contrast | Sum of squares | <i>F</i><br>d.f (2, 58) | <i>p</i> | $\eta_p^2$ |
|----------|----------------|-------------------------|----------|------------|
| i-ɪ      | 99.71          | 2.17                    | 0.123    | 0.07       |
| i-ɛ      | 66.42          | 1.73                    | 0.186    | 0.06       |
| i-a      | 56.21          | 1.26                    | 0.292    | 0.04       |
| i-ɒ      | 47.38          | 1.10                    | 0.338    | 0.04       |
| i-ɔ      | 41.82          | 1.08                    | 0.346    | 0.03       |
| i-u      | 57.49          | 1.74                    | 0.184    | 0.06       |
| ɪ-ɛ      | 157.52         | 5.17                    | 0.008    | 0.15       |
| ɪ-a      | 177.26         | 3.72                    | 0.030    | 0.11       |
| ɪ-ɒ      | 113.99         | 1.98                    | 0.146    | 0.06       |
| ɪ-ɔ      | 125.37         | 4.33                    | 0.017    | 0.29       |
| ɪ-u      | 196.59         | 5.43                    | 0.006    | 0.16       |
| ɛ-a      | 114.29         | 4.92                    | 0.010    | 0.15       |
| ɛ-ɒ      | 265.89         | 7.32                    | 0.001    | 0.20       |
| ɛ-ɔ      | 50.72          | 1.57                    | 0.321    | 0.04       |
| ɛ-u      | 83.27          | 2.07                    | 0.135    | 0.06       |
| a-ɒ      | 237.09         | 8.56                    | 0.000    | 0.23       |
| a-ɔ      | 93.86          | 1.77                    | 0.183    | 0.06       |
| a-u      | 30.71          | 0.68                    | 0.509    | 0.02       |
| ɒ-ɔ      | 128.56         | 3.21                    | 0.047    | 0.10       |
| ɒ-u      | 181.11         | 3.68                    | 0.031    | 0.11       |
| ɔ-u      | 94.49          | 3.15                    | 0.050    | 0.10       |
