# Supplementary material for: Development of neural perceptual vowel spaces during the first year of life
Source: PubMed Central journal article supplement (PMC6925299; doi:10.1038/s41598-019-55085-y), 2019-12-20
Supplement: 41598_2019_55085_MOESM3_ESM.pdf [file 41598_2019_55085_MOESM3_ESM.pdf]

## **Development of neural perceptual vowel spaces during the first year of life**

Kathleen M McCarthy<sup>\*1,3</sup>, Katrin Skoruppa<sup>2</sup>, and Paul Iverson<sup>3</sup>

<sup>1</sup>Department of Linguistics, Queen Mary University of London, Mile End Road, London E1 4NS, United Kingdom

<sup>2</sup>Institut des Sciences du Langage et de la Communication, Université de Neuchâtel, Rue Pierre-à-Mazel 7, 2000 Neuchâtel, Switzerland

<sup>3</sup>Speech, Hearing and Phonetic Sciences, University College London, Chandler House, 2 Wakefield Street, London, WC1N 1PF, United Kingdom

Table 2: Spectral measurements for vowel pairs

| Contrast | F1 difference<br>(ERB) | F2 difference<br>(ERB) | Spectral<br>difference<br>(Phon) |
|----------|------------------------|------------------------|----------------------------------|
| i-I      | 1.19                   | 1.09                   | 1.73                             |
| i-ε      | 5.71                   | 2.69                   | 4.19                             |
| i-a      | 6.94                   | 4.10                   | 4.48                             |
| i-ɒ      | 4.97                   | 6.90                   | 4.44                             |
| i-ɔ      | 1.13                   | 8.75                   | 4.06                             |
| i-u      | 0.02                   | 2.81                   | 2.70                             |
| ɪ-ε      | 4.52                   | 1.60                   | 2.97                             |
| ɪ-a      | 5.74                   | 3.01                   | 3.53                             |
| ɪ-ɒ      | 3.78                   | 5.81                   | 3.61                             |
| ɪ-ɔ      | 0.07                   | 7.66                   | 3.53                             |
| ɪ-u      | 1.17                   | 1.72                   | 2.25                             |
| ε-a      | 1.22                   | 1.41                   | 1.24                             |
| ε-ɒ      | 0.74                   | 4.21                   | 2.17                             |
| ε-ɔ      | 4.59                   | 6.06                   | 4.01                             |
| ε-u      | 5.69                   | 0.11                   | 3.46                             |
| a-ɒ      | 1.97                   | 2.80                   | 1.65                             |
| a-ɔ      | 5.81                   | 4.65                   | 4.21                             |
| a-u      | 6.91                   | 1.29                   | 3.71                             |
| ɒ-ɔ      | 3.84                   | 1.85                   | 3.10                             |
| ɒ-u      | 4.94                   | 4.09                   | 3.63                             |
| ɔ-u      | 1.10                   | 5.95                   | 3.08                             |
